# Supplementary material for: Aldh1l2 knockout mouse metabolomics links the loss of the mitochondrial folate enzyme to deregulation of a lipid metabolism observed in rare human disorder
Source: PubMed Central journal article supplement (PMC7654619; doi:10.1186/s40246-020-00291-3), 2020-11-09
Supplement: 40246_2020_291_MOESM1_ESM.pdf [file 40246_2020_291_MOESM1_ESM.pdf]

## **SUPPLEMENT (Krupenko et al)**

### **1. Supplementary figures S1-S12**

### **2. Supplementary Tables S1-S4**

### **Supplementary Data Files 1-6 (separate Excel files)**

**Supplementary Data Files 1:** liver and pancreas metabolomic data (three genotypes)

**Supplementary Data File 2:** VIP values (OPLSDA) for metabolomic data, liver and pancreas (three genotypes)

**Supplementary Data Files 3:** liver and plasma metabolomic data (wild type and Aldh112 KO, second experiment)

**Supplementary Data Files 4:** VIP values (OPLSDA) for metabolomic data, liver and plasma (wild type and Aldh112 KO, second experiment)

**Supplementary Data File 5:** list of metabolites overlapping between liver and plasma

**Supplementary Data File 6:** NanoString data and VIP values (OPLSDA analysis)

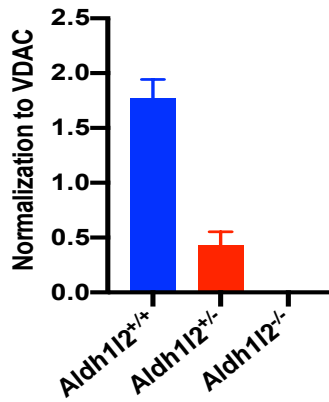

**Supplementary Fig. S1.** Intensity of ALDH1L2 bands (mean  $\pm$  SE) relative to VDAC (from Fig. 1d; calculated using Image J).

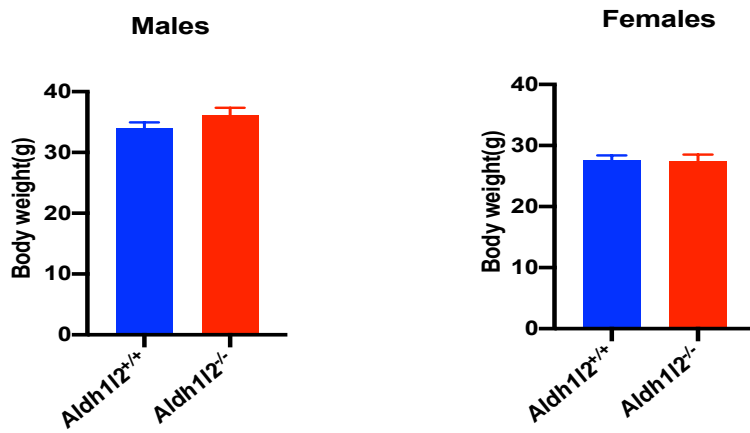

**Supplementary Fig. S2.** Body weights of Aldh112<sup>+/+</sup> and Aldh112<sup>-/-</sup> male and female mice at the age of 6 months.

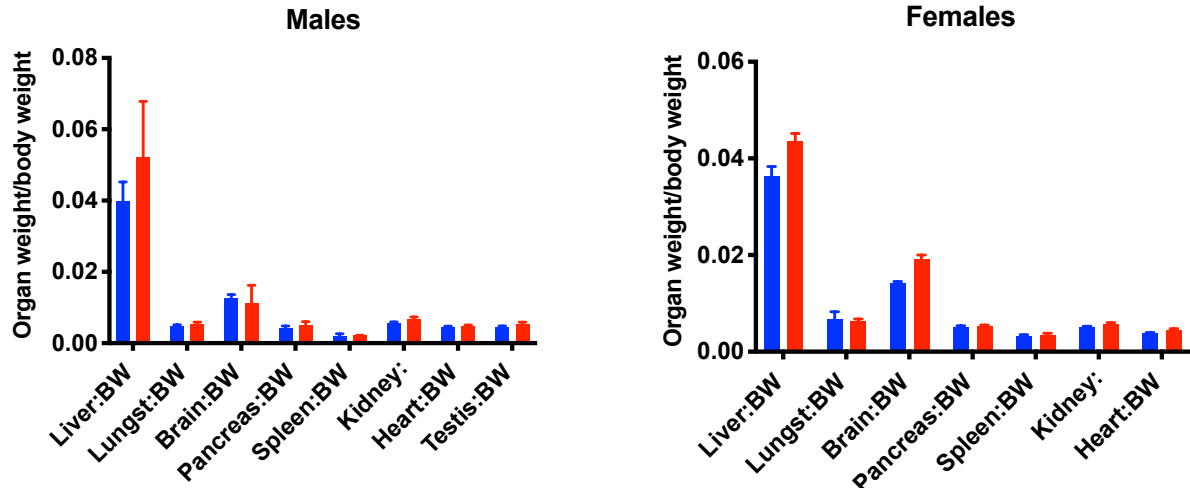

**Supplementary Fig. S3.** Organ to body weight ratio of *Aldh112*<sup>+/+</sup> and *Aldh112*<sup>-/-</sup> male and female mice at the age of 6 months.

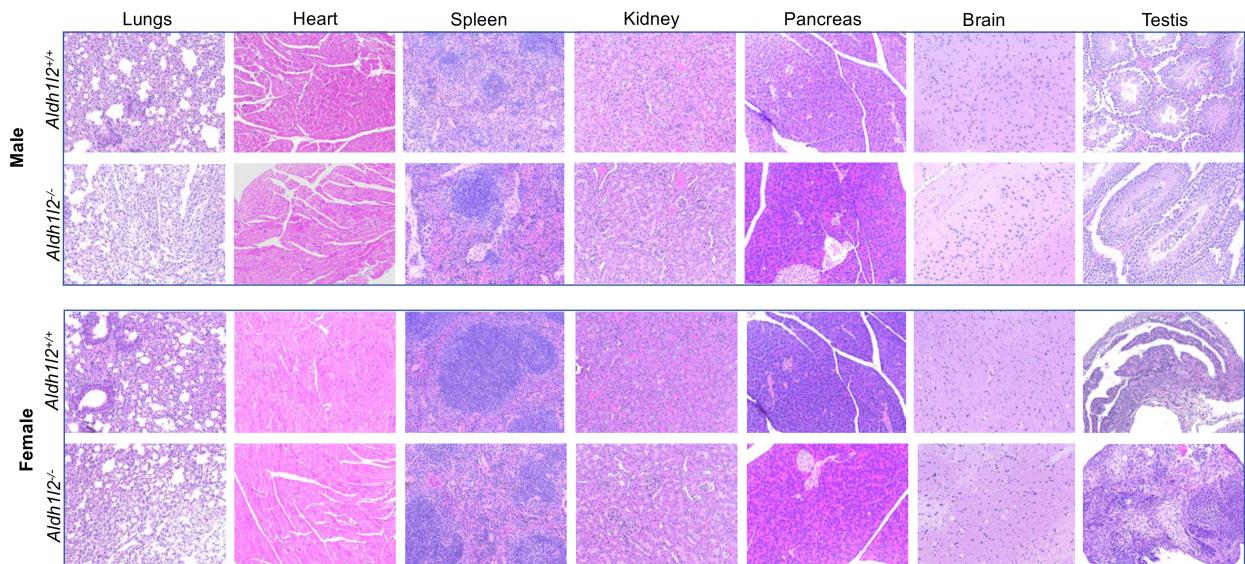

**Supplementary Fig. S4.** H&E staining of tissue sections from *Aldh112*<sup>+/+</sup> and *Aldh112*<sup>-/-</sup> mice.

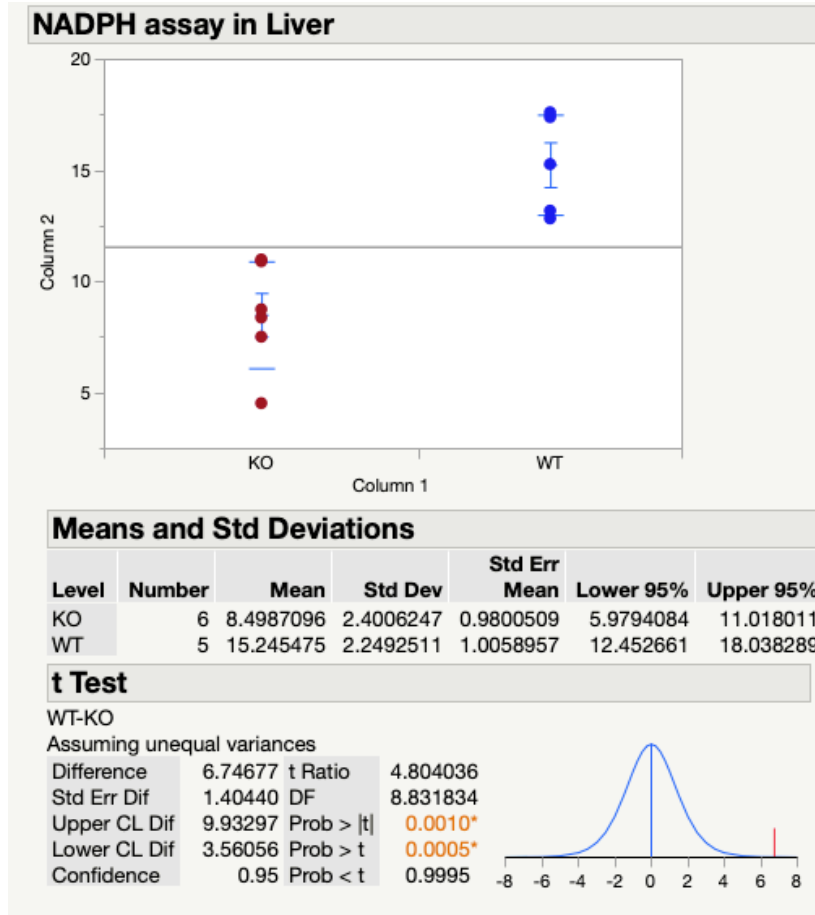

**Supplementary Fig. S5.** NADPH in liver of *Aldh1l2*<sup>+/+</sup> (WT) and *Aldh1l2*<sup>-/-</sup> (KO) mice measured by a fluorescence kit. 5-6 samples (mice) were analyzed for each genotype. Each sample was measured 4 times (technical replicate). Averages of technical replicates were used to calculate mean  $\pm$  SE.

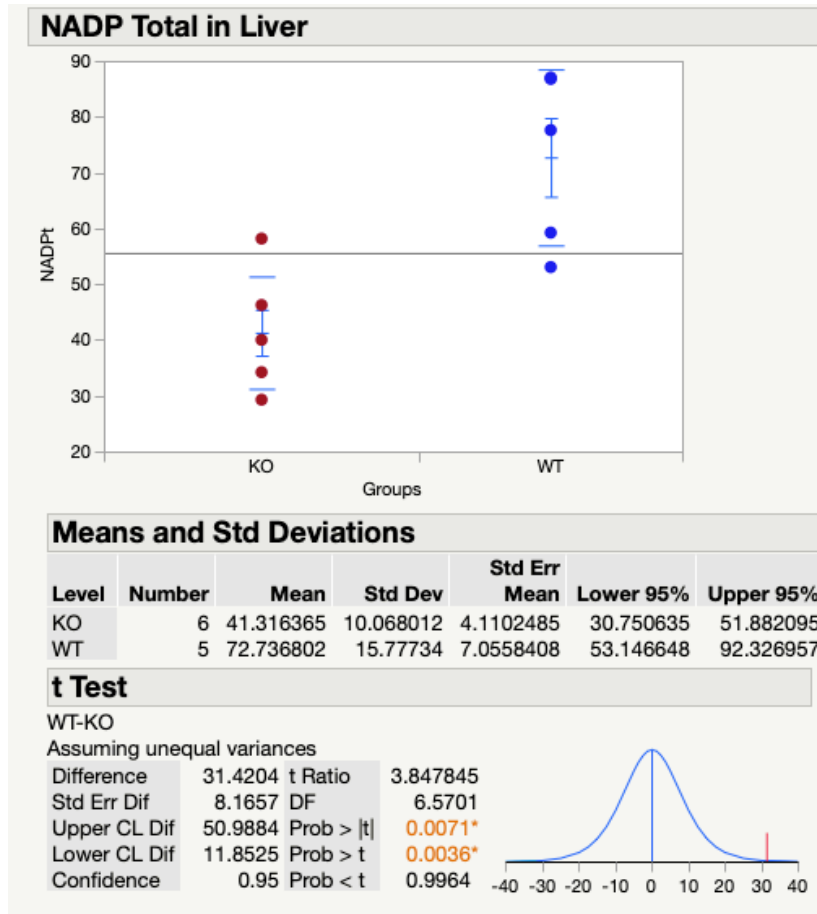

**Supplementary Fig. S6.** NADP Total (NADPt) in liver of *Aldh1l2*<sup>+/+</sup> (WT) and *Aldh1l2*<sup>-/-</sup> (KO) mice measured by a fluorescence kit. 5-6 samples (mice) were analyzed for each genotype. Each sample was measured 4 times (technical replicate). Averages of technical replicates were used to calculate mean  $\pm$  SE

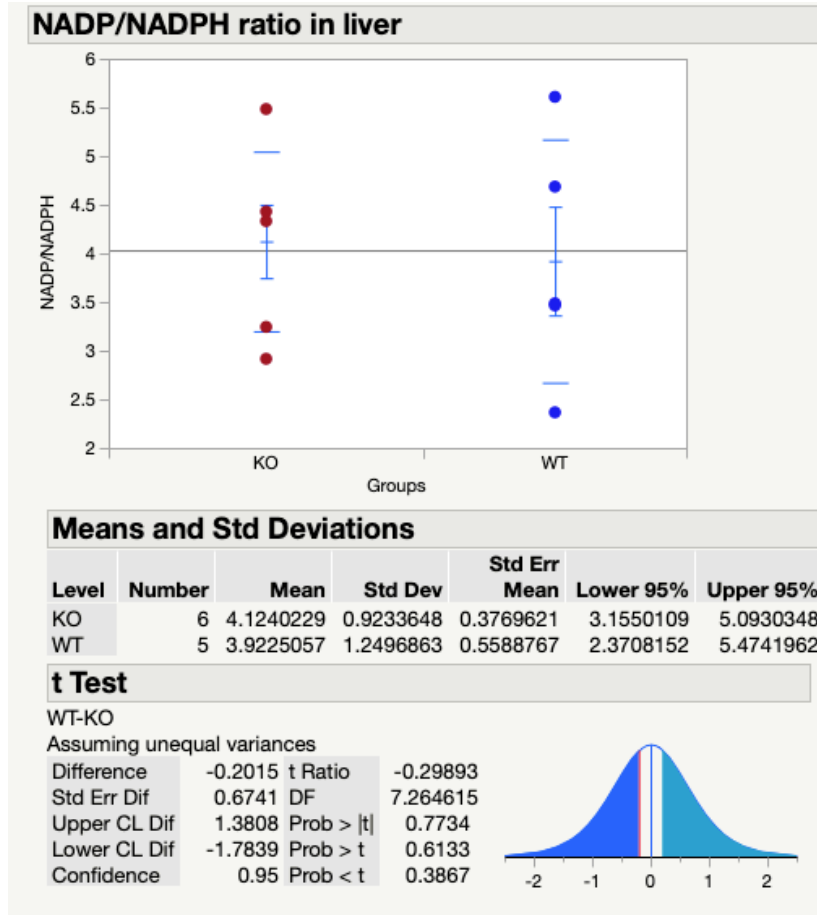

**Supplementary Fig. S7.** NADP/NADPH in liver of *Aldh1l2*<sup>+/+</sup> (WT) and *Aldh1l2*<sup>-/-</sup> (KO) mice measured by a fluorescence kit. 5-6 samples (mice) were analyzed for each genotype. Each sample was measured 4 times (technical replicate). Averages of technical replicates were used to calculate mean  $\pm$  SE.

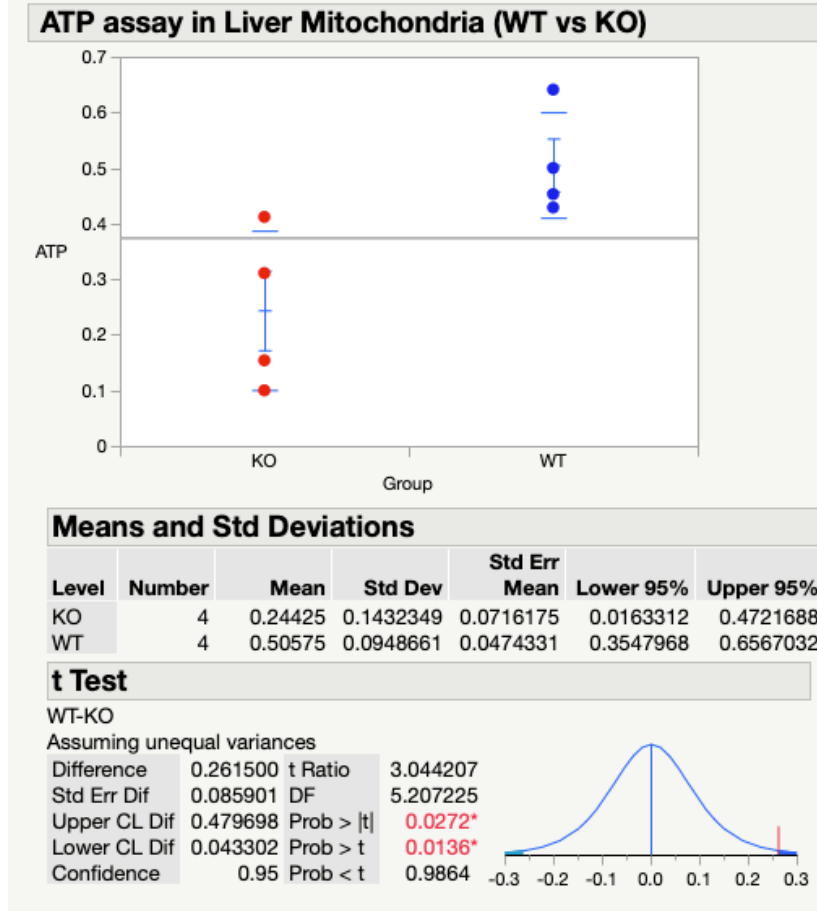

**Supplementary Fig S8.** Levels of ATP in mitochondria isolated from liver of *Aldh112*<sup>+/+</sup> (WT) and *Aldh112*<sup>-/-</sup> (KO) mice measured by a colorimetric assay. Four samples (mice) were analyzed for each genotype. Each sample was measured 4 times (technical replicate). Averages of technical replicates were used to calculate mean  $\pm$  SE.

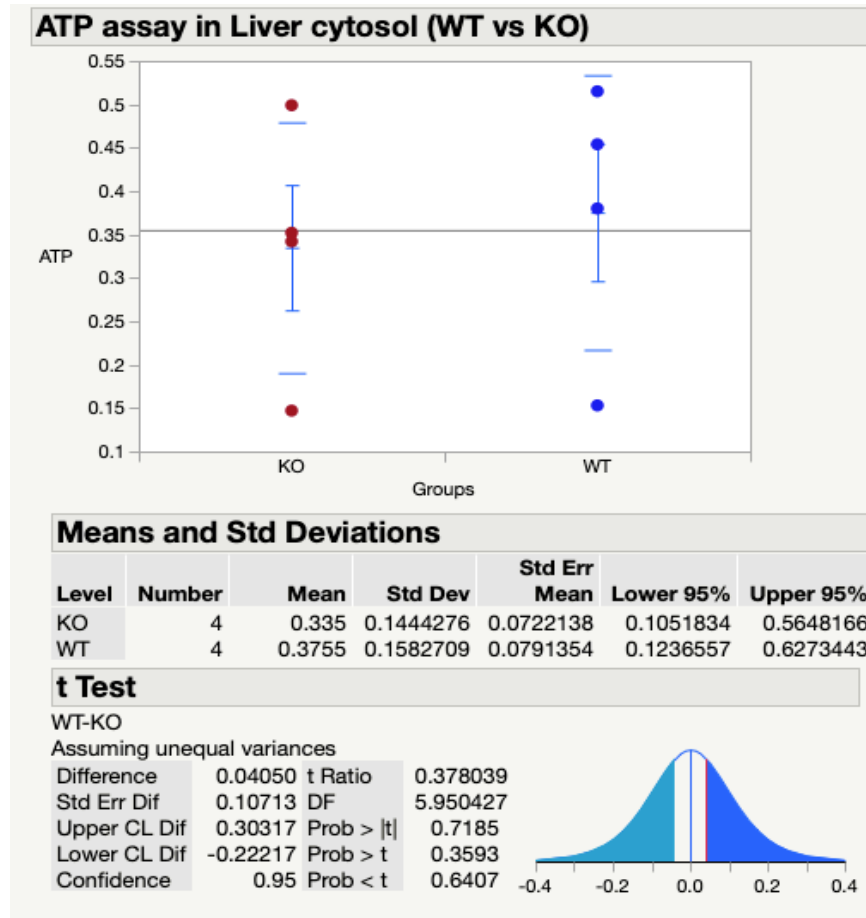

**Supplementary Fig S9.** Levels of ATP in cytosolic fraction isolated from liver of *Aldh112<sup>+/+</sup>* (WT) and *Aldh112<sup>-/-</sup>* (KO) mice measured by a colorimetric assay. Four samples (mice) were analyzed for each genotype. Each sample was measured 4 times (technical replicate). Averages of technical replicates were used to calculate mean  $\pm$  SE.



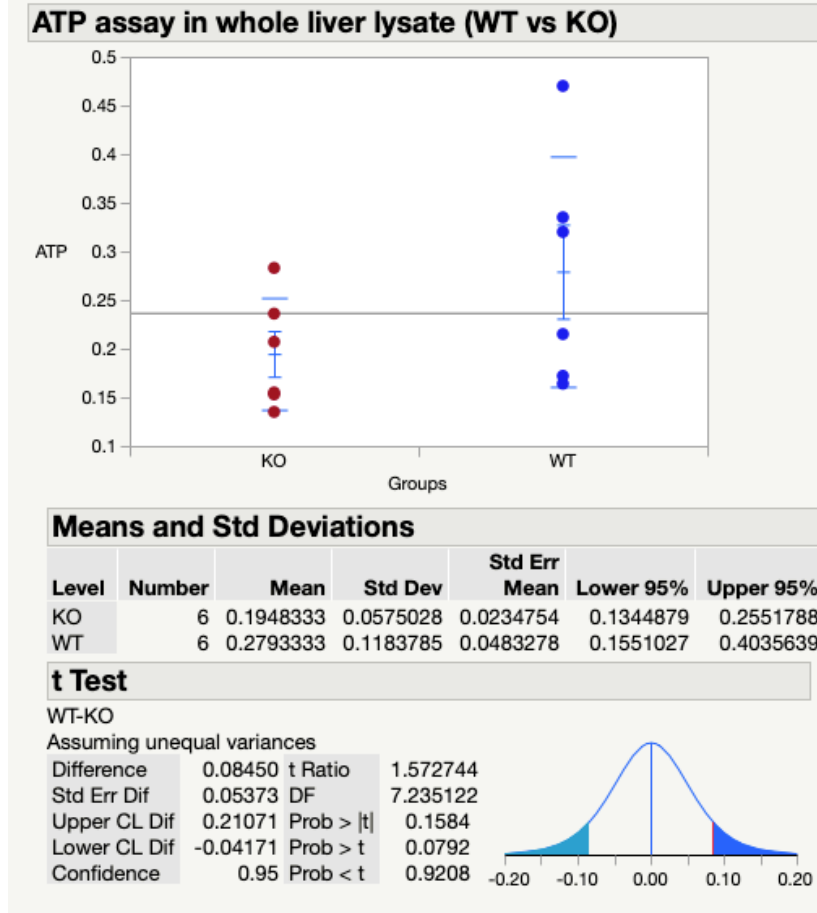

**Supplementary Fig S10.** Levels of ATP in whole liver lysate isolated from *Aldh1l2*<sup>+/+</sup> (WT) and *Aldh1l2*<sup>-/-</sup> (KO) mice measured by a colorimetric assay. Six samples (mice) were analyzed for each genotype. Each sample was measured 4 times (technical replicate). Averages of technical replicates were used to calculate mean  $\pm$  SE.

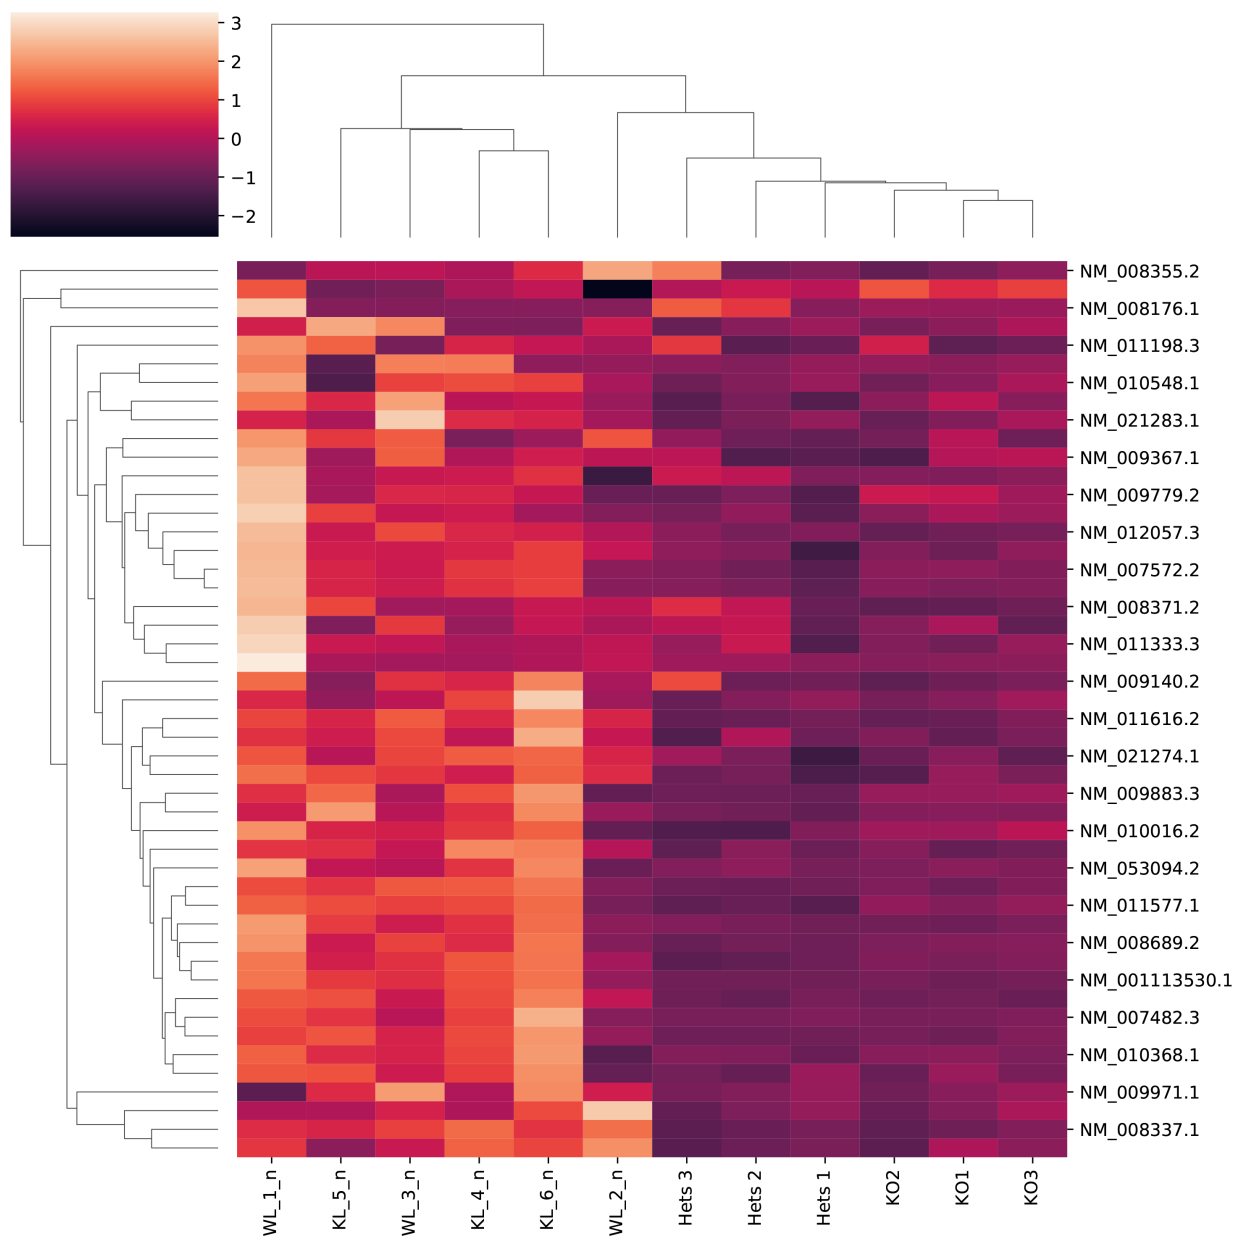

**Supplementary Fig S11.** Heat map representation of the NanoString data for the four genotypes.

Each protein was standardized so that it has mean 0 and standard deviation 1.

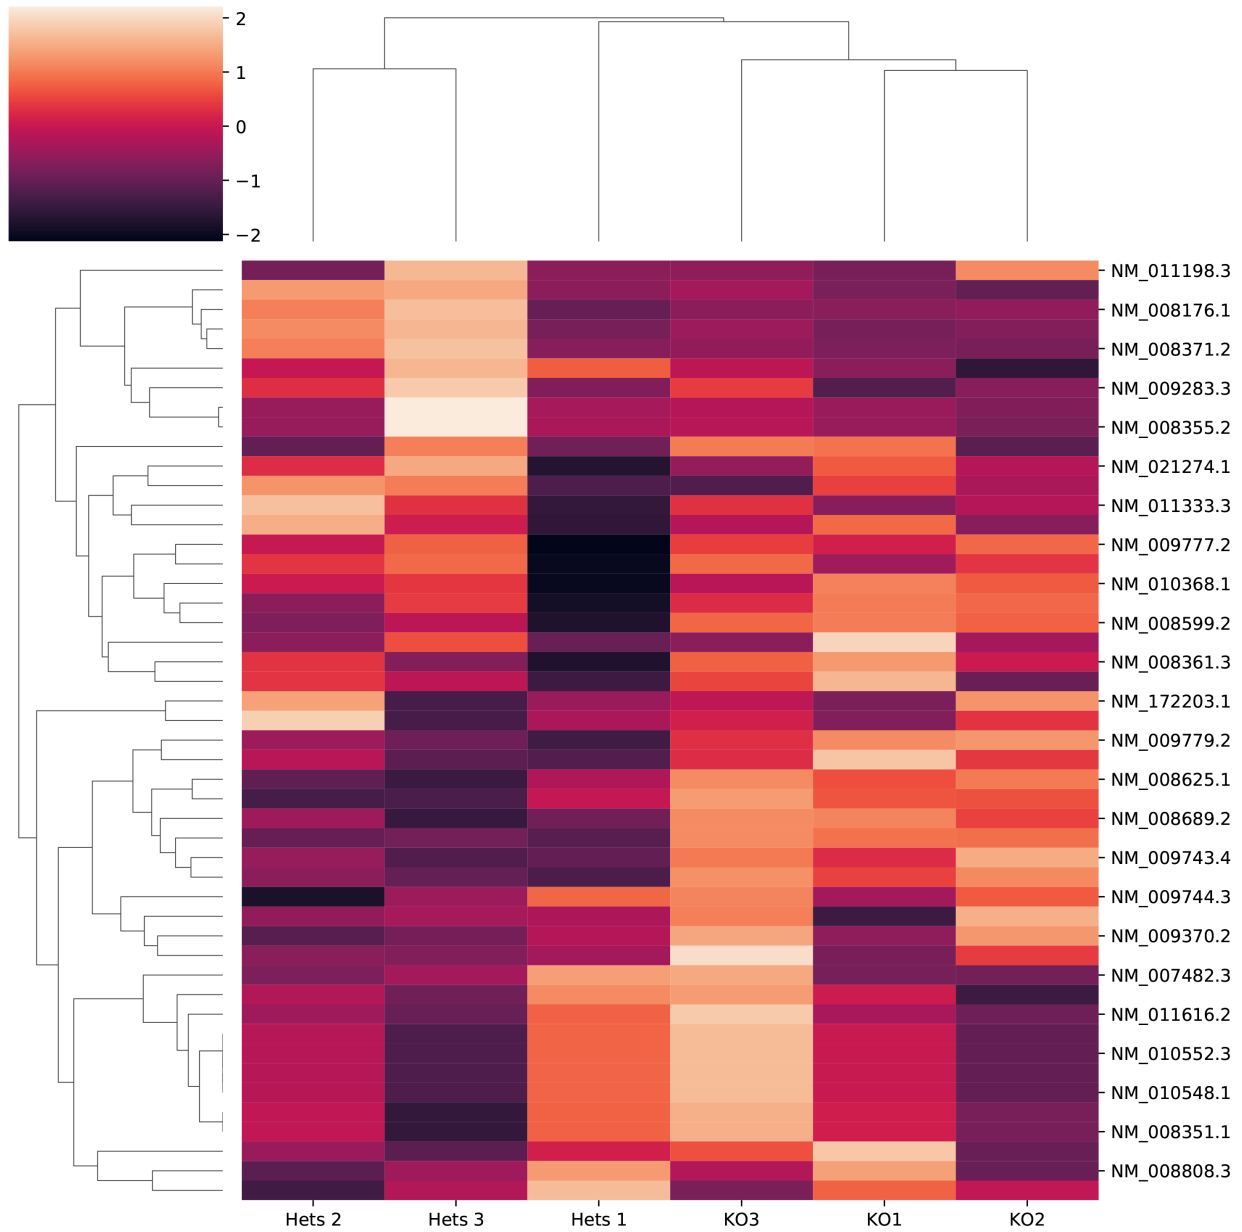

**Supplementary Fig S12.** Heat map representation of the NanoString data for the *Aldh1l*<sup>+/-</sup> and *Aldh1l2*<sup>-/-</sup> genotypes (based on the entire panel of 242 genes).

**Supplementary Table S1.** Primers used for genotyping.

| Primers | Sequence                          | Amplicon size (bp) |
|---------|-----------------------------------|--------------------|
| WTf     | 5'- AATTGGTGGTTCTCTCAAGTCTG -3'   | 338 bp             |
| WTr     | 5'- GCACCCATAAAGGGGCTCAAG -3'     |                    |
| RAF5-L2 | 5'- CACACCTCCCCCTGAACCTGAAA -3'   | 598 bp             |
| TTR1-L2 | 5'- GACATATACTGACCTCTGAGGGTGGC-3' |                    |

**Supplementary Table S2.** List of primary antibodies used for Western blot assays.

| Target  | Antibody          | Source   | Cat# or reference* | Dilution |
|---------|-------------------|----------|--------------------|----------|
| ALDH1L1 | Rabbit polyclonal | In-house | [1]                | 1:10,000 |
| ALDH1L2 | Rabbit polyclonal | In-house | [2]                | 1:10,000 |
| Hsp60   | Rabbit polyclonal | Abcam    | ab46798            | 1:20,000 |
| VDAC    | Rabbit monoclonal | Abcam    | ab154856           | 1:1,000  |
| Actin   | Mouse monoclonal  | Abcam    | ab8226             | 1:10,000 |

1 Krupenko, S. A. and Oleinik, N. V. (2002) 10-formyltetrahydrofolate dehydrogenase, one of the major folate enzymes, is down-regulated in tumor tissues and possesses suppressor effects on cancer cells. *Cell Growth Differ.* **13**, 227-236

2 Krupenko, N. I., Dubard, M. E., Strickland, K. C., Moxley, K. M., Oleinik, N. V. and Krupenko, S. A. (2010) ALDH1L2 is the mitochondrial homolog of 10-formyltetrahydrofolate dehydrogenase. *J. Biol. Chem.* **285**, 23056-23063

**Supplementary Table S3.** Fecundity, litter size weight and male/female numbers for different combinations of breeder genotypes. Data are expressed as mean  $\pm$  SE.

| Parameter      | M <sup>+/+</sup> X F <sup>+/+</sup> | M <sup>-/-</sup> X F <sup>+/+</sup> | M <sup>+/+</sup> X F <sup>-/-</sup> | M <sup>-/-</sup> X F <sup>-/-</sup> |
|----------------|-------------------------------------|-------------------------------------|-------------------------------------|-------------------------------------|
| # of pairs     | 3                                   | 7                                   | 6                                   | 3                                   |
| Litter freq/mo | 1.4 $\pm$ 0.05                      | 1.1 $\pm$ 0.05                      | 1.2 $\pm$ 0.08                      | 0.95 $\pm$ 0.07                     |
| Litter size    | 5.6 $\pm$ 0.35                      | 7 $\pm$ 0.38                        | 6.1 $\pm$ 0.40                      | 6.1 $\pm$ 0.59                      |
| No of males    | 34                                  | 115                                 | 83                                  | 61                                  |
| Weight(g)      | 14 $\pm$ 0.25                       | 13 $\pm$ 0.20                       | 12 $\pm$ 0.21                       | 13 $\pm$ 0.20                       |
| No of females  | 24                                  | 74                                  | 78                                  | 47                                  |
| Weight(g)      | 13 $\pm$ 0.26                       | 11 $\pm$ 0.26                       | 11 $\pm$ 0.17                       | 11 $\pm$ 0.18                       |

**Supplementary Table S4.** Sex and genotype distribution of progeny from intercrosses of *Aldh1l1*<sup>+/-</sup> mice.

| Genotype                      | Male      | Female     | Total      |
|-------------------------------|-----------|------------|------------|
| <i>Aldh1l2</i> <sup>+/+</sup> | 20(29%)   | 43(35%)    | 63(32%)    |
| <i>Aldh1l2</i> <sup>+/-</sup> | 33(48%)   | 49(40%)    | 82(43%)    |
| <i>Aldh1l2</i> <sup>-/-</sup> | 16(23%)   | 31(25%)    | 47(25%)    |
| <i>Total</i>                  | 69 (100%) | 123 (100%) | 192 (100%) |
